# Supplementary material
Source: publisher figshare collection journal article supplement (https://frontiersin.figshare.com/ndownloader/files/24688178)
Supplement: Supplementary file 1 [file 24688178]

## Sheet: A.1 Density
Unit name	Density values (g/cm3)				Average density (g/cm3)	Standard Deviation (g/cm3)	Error on mean (g/cm3)
PDC 1	1.3552	1.29124	1.06792	1.47164	1.2965	0.169702	0.0848511
PDC 2	1.34838	1.06548			1.20693	0.200043	0.141452
PDC 3	1.32911	2.34323	1.92756		1.86663	0.509801	0.294333
PDC 4	1.41089	0.916911	1.50955		1.27912	0.317536	0.18333
PDC 5	1.08098	0.858193	0.827567		0.922247	0.138319	0.0798586
PDC 6	1.53983	1.30599	0.989971		1.27859	0.275949	0.159319
PDC 7	1.53449	1.09407	1.08936	1.33103	1.26224	0.213714	0.106857
PDC 8	1.64624	1.44803	1.55461	1.48187	1.53269	0.0877966	0.0438983
PDC 9	1.46883	1.39565			1.43224	0.0517442	0.0365887
PDC 10	0.867354	0.796989	1.09137		0.918572	0.15373	0.088756
PDC 11	1.19943	1.28491			1.24217	0.060444	0.0427404
PDC 12	1.14094	1.03291	1.15214		1.10867	0.065841	0.0380133
Some samples were too small for more than 2 clasts to be analysed, which has led to a variation in the number of density values between PDC samples
METHODS
Each clast was cleaned of excess fine particles and weighed in air and deionised water (Archimede’s Principle) to determine the density.
To prevent an influx of water into the vesicles each clast was wrapped in sheets of Parafilm wax moulded into surface irregularities in the clasts and across vesicles in order to preserve their buoyancy.
A cage hanging from a zeroed precision balance prevented buoyant clasts from floating upwards, allowing their negative weight to be measured.
Heavier clasts sank to the bottom of the cage.

## Sheet: A.2 XRF geochemistry
	Major element geochemistry													Trace element geochemistry
Unit name	SiO2 (%)	TiO2 (%)	Al2O3 (%)	Fe2O3 (%)	MnO (%)	MgO (%)	CaO (%)	Na2O (%)	K2O (%)	P2O5 (%)	SO3 (%)	LOI (%)	Sum (%)	S (PPM)	F (PPM)	Cl (PPM)	Sc (PPM)	V (PPM)	Mn (PPM)	Cr (PPM)	Co (PPM)	Ni (PPM)	Cu (PPM)	Zn (PPM)	Ga (PPM)	As (PPM)	Rb (PPM)	Sr (PPM)	Y (PPM)	Zr (PPM)	Nb (PPM)	Mo (PPM)	Sn (PPM)	Sb (PPM)	Cs (PPM)	Ba (PPM)	La (PPM)	Ce (PPM)	Nd (PPM)	Tl (PPM)	Pb (PPM)	Th (PPM)	U (PPM)
PDC 1 Upper	54.38	0.77	17.34	8.61	0.15	6.5	8.88	2.88	0.72	0.1	0	0.88	101.24	0	392	264	33	235	1142	150	48	68	91	81	18	2	23	289	18	82	3	5	7	2	5	228	5	26	17	0	6	4	4
PDC 1 Lower	57.02	0.71	16.89	7.65	0.13	5.65	8.17	3.17	1.03	0.12	0	0.67	101.21	0	392	372	27	210	955	108	50	59	57	72	18	2	33	260	17	86	3	5	4	3	5	290	5	23	14	0	7	4	4
PDC 2	55.32	0.7	20.01	7.01	0.11	3.58	7.36	3.16	0.97	0.12	0.01	2.6	100.94	1952	392	583	23	184	828	49	36	35	66	75	21	2	30	224	17	89	3	5	4	1	5	288	5	22	12	0	7	3	4
PDC 2	56.9	0.69	19.2	6.99	0.11	3.82	7.79	3.47	1	0.11	0.01	1	101.08	586	392	610	22	187	849	66	38	38	94	72	18	2	32	235	18	86	3	5	12	2	4	282	5	20	11	0	8	3	4
PDC 3	59.97	0.78	18.2	5.79	0.09	2.52	6.23	3.8	1.96	0.16	0	0.66	100.16	81	392	492	17	159	688	24	27	23	95	72	19	4	73	254	19	142	6	5	3	4	5	396	10	32	16	0	17	7	4
PDC 3	60.16	0.77	18.42	5.92	0.09	2.59	6.06	3.79	1.99	0.16	0	1.09	101.04	407	392	44	18	133	732	15	28	27	84	65	19	3	92	243	16	135	5	5	4	2	5	432	9	28	17	0	9	5	4
PDC 4	58.69	0.73	16.81	7.22	0.12	4.25	6.71	3.23	1.72	0.14	0.01	1.11	100.74	530	392	492	20	158	815	72	32	33	42	69	18	4	65	222	19	123	5	5	2	1	4	377	10	32	16	0	12	5	4
PDC 5	58.48	0.75	16.81	7.34	0.12	4.15	6.88	3.26	1.69	0.14	0	1.3	100.93	158	392	660	20	162	827	55	38	36	46	67	18	4	67	228	19	124	5	5	5	3	5	382	11	34	21	0	8	5	4
PDC 5	58.29	0.71	17.13	7.04	0.11	4.05	6.59	3.15	1.71	0.15	0.01	1.8	100.74	1152	392	766	20	162	810	62	35	33	50	65	19	3	66	223	19	124	5	5	5	2	5	388	10	34	21	0	11	6	4
PDC 6	57.47	0.72	16.89	7.62	0.13	4.47	7.12	3.14	1.54	0.13	0	0.87	100.12	0	392	1012	24	184	946	56	36	35	61	77	17	3	61	213	21	120	5	5	6	2	4	327	9	32	11	0	9	4	4
PDC 7 (Flow 1)	57.5	0.77	17.26	7.37	0.12	4.01	7.19	3.23	1.54	0.14	0	0.95	100.08	62	392	1045	24	202	918	41	32	20	51	79	18	3	57	254	19	121	5	5	8	3	5	363	10	36	13	0	9	3	4
PDC 7 (Flow 2)	57.92	0.8	17.39	7.77	0.12	4.26	7.29	3.28	1.57	0.15	0	0.95	101.49	0	392	952	25	203	928	41	34	24	34	79	17	3	56	247	20	116	4	5	2	0	5	347	8	32	18	0	8	5	4
PDC 8	57.76	0.75	17.31	7.39	0.12	4.42	7.34	3.26	1.44	0.13	0	0.76	100.69	27	392	71	24	148	890	51	37	36	29	65	18	2	51	232	18	107	4	5	2	2	5	339	13	28	15	0	6	4	4
PDC 8	56.79	0.74	17.23	7.64	0.13	4.42	7.15	3.15	1.57	0.13	0	1.43	100.39	330	392	64	23	195	938	65	40	36	31	71	18	3	59	230	19	113	4	5	2	2	5	323	7	33	11	0	9	5	4
PDC 9	56.07	0.82	17.67	8.46	0.14	4.92	8.15	3.14	1.2	0.13	0	0.51	101.22	5	392	899	29	250	1066	36	38	23	38	84	18	3	41	253	21	96	4	5	4	2	5	367	12	31	15	0	6	3	4
PDC 10	57.84	0.74	17.61	6.74	0.12	3.73	5.96	3.11	1.77	0.15	0.01	2.81	100.6	829	392	2014	17	145	811	56	37	34	45	65	18	4	71	215	18	151	5	5	6	2	5	395	12	39	19	0	14	8	4
PDC 11	57.05	0.75	17.76	7.72	0.13	4.37	6.91	3.19	1.49	0.14	0.01	1.68	101.19	1293	392	1221	21	184	876	58	29	26	63	72	19	4	56	226	19	118	4	5	4	2	5	329	11	31	15	0	9	5	4
PDC 12	58.85	0.67	17.4	6.88	0.11	4.58	7.49	3.53	1.48	0.12	0	0.18	101.29	80	392	570	20	200	803	72	39	46	56	70	18	3	50	260	16	100	3	5	6	2	7	350	10	21	15	0	10	3	4
Error = +/- 5%
METHODS
Cleaned and dried samples were crushed using a disc mill, then powdered using a tungsten carbide ring mill.
Powders were dried in a 100°C oven overnight.
For major element analysis, 2g of dried powders was measured and placed in a muffle furnace at 900°C for 3 hours in order to burn off organic material.
The powder was weighed prior to and after being placed in the furnace in order to calculate the loss on ignition (LOI).
To create glass beads, 0.8g of sample material was mixed with 8g of X-Ray Flux (35.3% Lithium Tetraborate, 64.7% Lithium Metraborate), then fused.
Samples for trace element analyses were prepared according to the methods described by Watson (1996).
Approximately 10g of rock powder was combined with roughly 1ml of polyvinylpyrrolidone-mthylcellulose (PVP-MC) binding liquid.
This mixture was then compressed in a steel mould at approximately 1.6 tonnes/cm2, and dried in a 45°C oven overnight.

## Sheet: A.3 Field descriptions
Unit name	Notes
PDC 1	Orange/yellow outcrop with large dark grey bombs. Poorly sorted, reverse graded. Breadcrusted bombs, some vesicularity, clasts = 20-30% of outcrop, max. 40cm. Matrix composed of ash and lapilli pumice, medium vesicularity with dark crystals. Occasional lithic clast (dense, well rounded, dark grey).
PDC 2	Orange unit with black bombs, well indurated, thickens slightly in valley, matrix supported, poorly sorted (ash to small bombs ~10cm). Clast rich, black scoria, sub-angular to sub-rounded, moderate to high vesicularity. Some dense, light and dark grey clasts. Minor reverse grading (scoria concentrated near top of flow. Orange ash and clay-rich matrix – weathered. 70-100cm
PDC 3	Bright red, poorly sorted, angular to sub-angular, slightly vesicular. Clasts red exterior, inside = dark grey with white crystals. Poorly consolidated on top of flow. 8m.
PDC 4	Black outcrop. Poorly sorted (ash – blocks ~50cm), subrounded, monomictic, well indurated, matrix supported, 30% clasts. 4m thick, continuous layer across valley.
PDC 5	Light grey/brown, poorly indurated, poorly sorted, reverse grading. Pale clasts exterior, black scoriaceous interior. Large black scoriaceous clasts are 25% of outcrop, sub rounded. Dense dark grey clasts 3% of outcrop, sub rounded to sub angular. Erosional benches suggest multiple pulses. Approx. 6m thick.
PDC 6	Poorly sorted, matrix supported, pumice-rich. Breadcrusted bombs = max. 50cm. Occasional red and grey lapilli lithic Light brown outcrop, 1m exposed.
PDC 7	Pumice-rich, poorly sorted, matrix supported, pale tan/grey. 1m thick.
PDC 8	Rounded clasts with minor vesicularity (small vesicles). Poorly sorted, matrix supported (clast rich). Loose material above indurated base. Varies between 2-4m. Grey with pink and red thermal alteration
PDC 9	Well indurated, pale yellow fine ash matrix. Black, breadcrusted bombs. Some dense, black, angular lithics. 20x20m, 1m thick
PDC 10	Large flat area, pumice-rich, fine ash matrix with lapilli and bombs (max. 15cm). Bombs – cauliflower, black, dense with white crystals. Pumice = dark grey interior, light brown exterior, black crystals, moderately to very vesicular. ~10 x 10m.
PDC 11	Pale yellow/brown, moderately to highly vesicular clasts, poorly sorted, matrix supported. Fine sand sized ash - ~15cm bombs. Clasts black interior with small black and white crystals.
PDC 12	Poorly sorted, scoria clasts (max. ~50cm), poorly to moderately indurated, cauliflower bombs, clast supported (50-60%), highly vesicular. Contains spatter clasts, suggesting high temperature emplacement
